# Supplementary material for: Assessment of Tilapia (Oreochromis spp.) Welfare in the Semi-Intensive and Intensive Culture Systems in Thailand
Source: MDPI journal article supplement (doi:10.3390/ani13152498), 2023-08-02

**Supplementary Table S1.** The assessment of health factors in tilapia (Pedrazzani et al., 2020).

| Indicators    | Score | Descriptions or Reference Values                                            |
|---------------|-------|-----------------------------------------------------------------------------|
| Eyes          | 1     | Apparently functional and healthy                                           |
|               | 2     | Haemorrhage, exophthalmos, traumatic injury; Unilateral                     |
|               | 3     | Haemorrhage, exophthalmos, traumatic injury; Bilateral                      |
|               | 4     | Bilateral cataract, chronic condition, impaired vision                      |
| Jaws          | 1     | Normal aspect, healthy                                                      |
|               | 2     | Light to moderate superior or inferior deformity                            |
|               | 3     | Severe superior or inferior deformity (affecting feeding)                   |
| Operculum     | 1     | Normal aspect, healthy                                                      |
|               | 2     | Partially covering the gills ( $\geq 75\%$ covered)                         |
|               | 3     | Partially covering the gills ( $< 75\%$ covered)                            |
|               | 4     | Unilateral or bilateral absence                                             |
| Skin          | 1     | Normal aspect, healthy                                                      |
|               | 2     | Scar tissue, scale loss, ulcers, or superficial injuries $< 1 \text{ cm}^2$ |
|               | 3     | Ulcers or superficial injuries $> 1 \text{ cm}^2$ , redness, light necrosis |
|               | 4     | Severe necrosis, darkening, bleeding, inflammation                          |
| Fins          | 1     | Normal, healthy appearance                                                  |
|               | 2     | Scarred or slightly necrotic tissue                                         |
|               | 3     | Moderate injury or necrosis (thickening/splitting)                          |
|               | 4     | Severe necrosis, bleeding, inflammation, exposure of the rays               |
| Gills         | 1     | Normal aspect, healthy                                                      |
|               | 2     | Light injury or necrosis, thickening or splitting                           |
|               | 3     | Moderate injury or necrosis, thickening or splitting                        |
|               | 4     | Severe necrosis, bleeding, inflammation, pallor or darkening                |
| Spine         | 1     | Normal structure                                                            |
|               | 2     | Lordosis or scoliosis, normal weight                                        |
|               | 3     | Lordosis or scoliosis, weight loss                                          |
| Ectoparasite  | 1     | No infestation                                                              |
|               | 2     | Moderate infestation ( $\leq 5$ parasites)                                  |
|               | 3     | Intense infestation ( $> 5$ parasites)                                      |
| Mortality (%) | 1     | $\leq 10\%$                                                                 |
|               | 2     | $\leq 25\%$                                                                 |
|               | 3     | $\leq 50\%$                                                                 |
|               | 4     | $> 50\%$                                                                    |

**Supplementary Table S2.** The assessment of environmental factors in tilapia (Pedrazzani et al., 2020).

| Indicators                           | Score | Descriptions or reference values                         |
|--------------------------------------|-------|----------------------------------------------------------|
| Temperature (°C)                     | 1     | 25 – 32                                                  |
|                                      | 2     | 20 – 24                                                  |
|                                      | 3     | 33 – 37                                                  |
|                                      | 4     | <20 or >37                                               |
| pH                                   | 1     | 6.0 – 8.5                                                |
|                                      | 2     | 5.5 – 5.9 or 8.6 – 8.9                                   |
|                                      | 3     | 9.0 – 10.0                                               |
|                                      | 4     | <5.5 or >10.0                                            |
| Transparency (cm)                    | 1     | 25 – 40                                                  |
|                                      | 2     | 41 – 65                                                  |
|                                      | 3     | <25 or >65                                               |
| Oxygen saturation (mg/L)             | 1     | 5.29 – 7.18                                              |
|                                      | 2     | 3.78 – 5.21                                              |
|                                      | 3     | 2.27 – 3.7                                               |
|                                      | 4     | <2.27 or >7.18                                           |
| Non-ionized ammonia ( $NH_3$ ; mg/L) | 1     | 0.00 – 0.05                                              |
|                                      | 2     | 0.05 – 0.10                                              |
|                                      | 3     | >0.10                                                    |
| Nitrite ( $NO_2^-$ ; mg/L)           | 1     | 0.00 – 0.50                                              |
|                                      | 2     | 0.51 – 1.00                                              |
|                                      | 3     | >1.00                                                    |
| Alkalinity (mg/L of $CaCO_3$ )       | 1     | 30 – 100                                                 |
|                                      | 2     | 20 – 30 or 100 – 200                                     |
|                                      | 3     | <20 or >200                                              |
| Shading (%)                          | 1     | Homogeneous shading; 20 – 30                             |
|                                      | 2     | Homogeneous shading; 31 – 40                             |
|                                      | 3     | Homogeneous shading; <20 or >40 or heterogeneous shading |
| Predators                            | 1     | Absence                                                  |
|                                      | 2     | Controlled presence                                      |
|                                      | 3     | Uncontrolled presence                                    |
| Interspecific inhabitants            | 1     | Absence                                                  |
|                                      | 2     | Controlled presence                                      |
|                                      | 3     | Uncontrolled presence                                    |
| Stocking density*                    | 1     | Ideal to 10% overpopulation                              |
|                                      | 2     | 10 – 20% overpopulation                                  |
|                                      | 3     | > 20% overpopulation                                     |

The optimal stocking density for earthen ponds without aeration is 1–3 fish/m<sup>2</sup> for fish weighing 1–300 g, while aeration is 5 fish/m<sup>2</sup>. For cages culture, the optimal stocking density are: 2,000–3,000 fish/m<sup>2</sup> for fish weighing 1–30 g, 1,000–1,500 fish/m<sup>2</sup> for fish weighing 30–300 g, and less than 1,000 fish/m<sup>2</sup> for fish weighing > 300–1,000 g.

**Supplementary Table S3.** The assessment of behavioural factors in tilapia (Pedrazzani et al., 2020)

| Management       | Score | Criteria                                                                        |
|------------------|-------|---------------------------------------------------------------------------------|
| Feeding duration | 1     | Apprehension of all food in 180 to 360 second                                   |
|                  | 2     | Apprehension of all food in 120 to 179 second                                   |
|                  | 3     | Apprehension of all food in < 120 second                                        |
|                  | 4     | No apprehension of all food or ≥ 360 second                                     |
| Capture period   | 1     | Normal swimming, no or low dorsal fins or body parts on surface                 |
|                  | 2     | Excited swimming behaviour, >20 dorsal fins or low body parts on surface        |
|                  | 3     | Swimming in different directions or decreasing activity, fish stuck against net |
|                  | 4     | Many fish floating on side, explosion of body to air, exhaustion                |

**Supplementary Table S4.** The assessment of nutrition factors in tilapia between raising systems, adapted from previous study (Pedrazzani et al., 2020)

| Raising system | Weight (g) | Age (days) | Stock density (fish/m <sup>2</sup> ) |                      | FCR     | CP (%) |
|----------------|------------|------------|--------------------------------------|----------------------|---------|--------|
|                |            |            | No aeration<br>or renew              | Aeration<br>or renew |         |        |
| Earthen pond   | 1–30       | 40–80      | 20–30                                | 40–50                | 0.8–1.0 | 36–40  |
|                | 30–200     | 80–120     | 4–5                                  | 6–10                 | 1.2–1.3 | 28–32  |
|                | 200–1,000  | >120       | 0.8–1.2                              | 2–3                  | 1.4–1.6 | 28–32  |
| Cage           | 1–30       | 40–90      | 1,200–1,500                          |                      | 0.8–1.0 | 40     |
|                | 30–200     | 90–120     | 450–500                              |                      | 1.2–1.4 | 32     |
|                | 200–1,000  | >120       | 100–150                              |                      | 1.6–2.0 | 32     |

**Figure S1.** Score distribution of eyes, jaw, operculum, skin, fins, gills and spine among eight farms. Score 1; green, score 2; yellow, score 3; orange and score 4; red

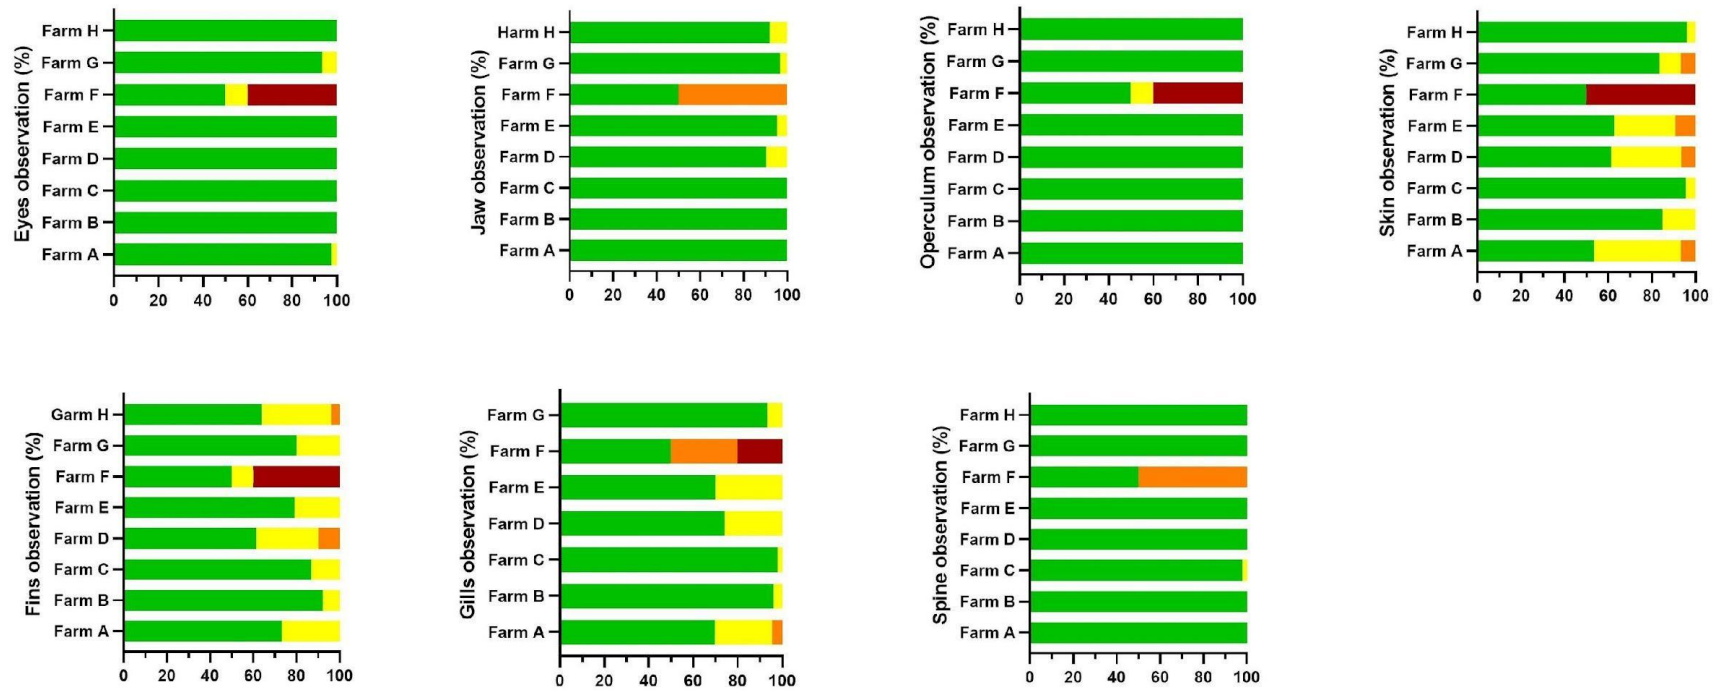

Supplement: s1 [file s1]
